# Supplementary material for: Aspergillus fumigatus tryptophan metabolic route differently affects host immunity
Source: PubMed Central journal article supplement — Cell Rep. 2021 Jan 26;34(4):108673. doi: 10.1016/j.celrep.2020.108673 (PMC7844877; doi:10.1016/j.celrep.2020.108673), 2021-01-26
Supplement: mmc1.pdf [file mmc1.pdf]

## Supplemental Information

### ***Aspergillus fumigatus* tryptophan metabolic route differently affects host immunity**

**Teresa Zelante, Tsokyi Choera, Anne Beauvais, Francesca Fallarino, Giuseppe Paolicelli, Giuseppe Pieraccini, Marco Pieroni, Claudia Galosi, Claudia Beato, Antonella De Luca, Francesca Boscaro, Riccardo Romoli, Xin Liu, Adilia Warris, Paul E. Verweij, Eloise Ballard, Monica Borghi, Marilena Pariano, Gabriele Costantino, Mario Calvitti, Carmine Vacca, Vasilis Oikonomou, Marco Gargaro, Alicia Yoke Wei Wong, Louis Boon, Marcel den Hartog, Zdeněk Spáčil, Paolo Puccetti, Jean-Paul Latgè, Nancy P. Keller, and Luigina Romani**

|              |     |                                                                                   |     |
|--------------|-----|-----------------------------------------------------------------------------------|-----|
| <b>hIDO1</b> | 1   | MAHAMENSWTI-----SKEYHIDEEVGFALPN-PQENLPD-FYNDWMFIAKHLPD-----LIE                   | 51  |
| <b>IDOA</b>  | 1   | MI----PPIPA-----LADYGVSPDHGFLPPEPPELEALDPDYAKWEWTASNLQS-----LLH                   | 49  |
| <b>IDOB</b>  | 1   | M---LNTPEIV-----LDQFCVSLRNGFLPDTLPLQKLNOPYSPWEEVVADLPA-----LLT                    | 50  |
| <b>IDOC</b>  | 1   | MTQNKFPPTSTTTLKRFPHIHDDPATLPRSLDPFTITTTSTGFLPYCTSPTTLPD-AFKPLMDLLDRMPVVRQDGSPLLA  | 79  |
| <b>hIDO1</b> | 52  | SGQLRERVE-KLNLML--SIDHLTDHKSQRLARLVLG-----CITMAYV-----WCK----GHGDVR-----KV        | 102 |
| <b>IDOA</b>  | 50  | SGRIRDVVN-CLPIL--QTRYLHSEDEWRRAYVVLV-----FMLHGYV-----WGG----KTPEEVHMLTLMVDSQR     | 109 |
| <b>IDOB</b>  | 51  | AGNLRQAVD-SLPIL--STSKLQEESEWRRAYVVLV-----FITTHAYI-----WG----GEQP-K-----DV         | 99  |
| <b>IDOC</b>  | 80  | KYELGPAVETELPDLTDEVDKIVTADGSRDLYMVTAVFRDYSFLASAYLLEPCWENWCKAPENGYGLGR-----DK      | 150 |
| <b>hIDO1</b> | 103 | LPRNIAVPYCQLSKKLELPPILVYADG- LANWKKKDPNKPLT-YENMDVLFVFRDGDG---SKG L SLL I AAAAS   | 176 |
| <b>IDOA</b>  | 110 | I PPQLTIPLLEVDCHLELPPVATYAA- CLWNYKPIFPDEPAYDLNLACINTLTGSLD---ERW Y L SVG E ARGAP | 184 |
| <b>IDOB</b>  | 100 | LPPAVSCPILVSKHLELPPCATYAA- NLWNFKVSSPIDLTPNPNLSIITTTFTGTDK---EEW M SVA E AKGAD    | 174 |
| <b>IDOC</b>  | 151 | LPKAVARPMYHCAQLLDIPPFMSYAA YSLFNYHLADPSKGLV-YDNLRLVRAFERGLDPKSSEAG L THID E KESNG | 229 |
| <b>hIDO1</b> | 177 | AIKVIPTVFKAMQM-ERDTLILKALLEIASCLEK LQV HQ HDH NPKA FSV RTY SGWKGNPQ--LSDGLVY-EGF  | 252 |
| <b>IDOA</b>  | 185 | AIPVLVQAISAARTG-NSRVVTECLQSIAELLDQ GVL ER YEHC DPYV YHR RPY G SKNMADAGLPNGLLY-DDG | 262 |
| <b>IDOB</b>  | 175 | LITLMLHAIYAANLA-DDQRVTSLLYQLSDGLKE GEI ER YEKCNPHV FYQ RPY G SKNMAAGLPQGVFYDQGG   | 253 |
| <b>IDOC</b>  | 230 | LISGALKVVDTLEQGGPRSEVNDGFREILASMEK EAC ED WANSKP-AYLS RVF G I TSQSM--FPNGVIY-DGV  | 305 |
| <b>hIDO1</b> | 253 | WEDP--KEF GGS GQ SV QCFDVLGIGQTTAGGGH---AAQ----- QDMRRYMPPAHRNFLCSLES             | 312 |
| <b>IDOA</b>  | 263 | SEEPEYRQYGGGSN QSS L QFFDIALGIEHRPTGETRPASTPSEDEKEGVTGAPRHG QEMRTYMPGPHRRFLEHVSA  | 342 |
| <b>IDOB</b>  | 254 | HGEW--HQYGGGSN QSS L QAFDIFLQVEHSATGEAKLSNTS QYK-----PKIGY QDMRNYMPGPHRRFLEMMIR   | 323 |
| <b>IDOC</b>  | 306 | LDNKP-LYFRGSSG N G SM PLLDHLLQIPMPSTPLTK----- HEFRAYRPLPHREFLAYIDS                | 364 |
| <b>hIDO1</b> | 313 | NP---SVREFVLS-KGDAGLREAYDACVKALVS RSYHLQ TKY LIPAS---QQPKENKTSSEDPKSL-----        | 374 |
| <b>IDOA</b>  | 343 | VA---NIREYVEARRSDKALCLAYDACLA MLRA RDKHTIQ SRY TTPARDARNRTPET---SNARRPSTIMNLANVRP | 416 |
| <b>IDOB</b>  | 324 | LS---NVRQFAMNYNADTEVRNAYNTAVMAVGA RDKHTIQ SRY LTPSR---TKPTR--MSSAQVNLATVIAAHQVT   | 394 |
| <b>IDOC</b>  | 365 | KAAEV DVNRFAVQ---DTETTVLLKTLNHVRS RWRHWL REY T---K---RTPHP-----                   | 414 |
| <b>hIDO1</b> | 375 | -----EAKTGGT D MN KT RSTTE-----KSLLEKGE-----                                      | 403 |
| <b>IDOA</b>  | 417 | GSK---KLRGTGGT I P KQ RDETGEPAIDAWARRLLSNGPAEPSFAALS KLGHEHPDGHLEVVGLSGTWTADDSEG  | 492 |
| <b>IDOB</b>  | 395 | RSKDTPAEYSGTGGT D I P KQ TRDTTK-----AAAKYTD-----                                  | 430 |
| <b>IDOC</b>  | 415 | -----TATGGS V T P N QLSAVMDLMVSYDYTYLAPQKAAGVVSNHGLAYDATVQKQVEPMMEMVRDQREKLAR     | 485 |
| <b>hIDO1</b> |     | -----                                                                             |     |
| <b>IDOA</b>  | 493 | GICHW-----                                                                        | 497 |
| <b>IDOB</b>  |     | -----                                                                             |     |
| <b>IDOC</b>  | 486 | EVERWCKERGV                                                                       | 496 |

**Figure S1. (Sequence alignment of *A. fumigatus* IdoA, IdoB, IdoC and human IDO1), Related to Figure 1.** Protein sequence alignment between *Aspergillus* IdoA, IdoB, IdoC and human IDO1 protein sequences used to build the homology models. Binding site residues are colored according to their properties: polar positive cyan, polar negative red, polar neutral magenta and non-polar green.

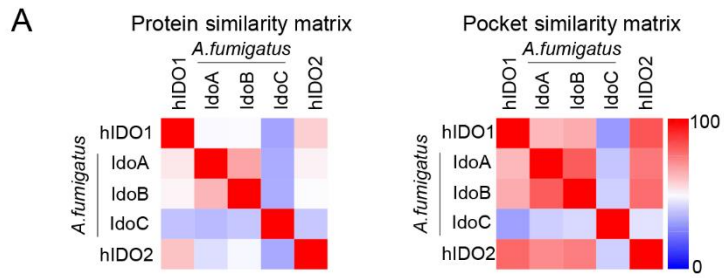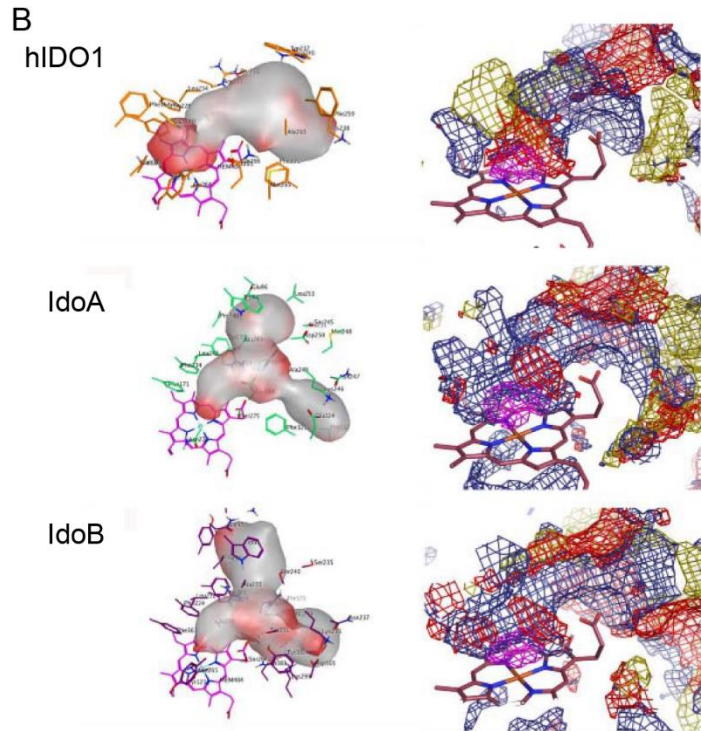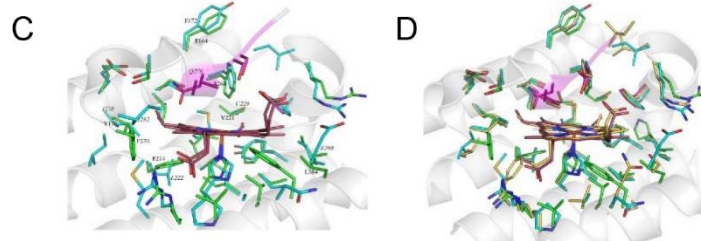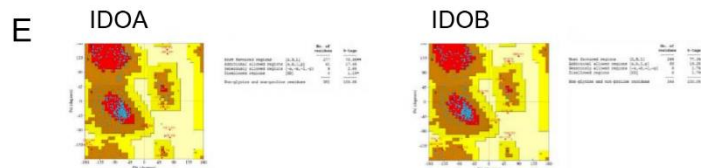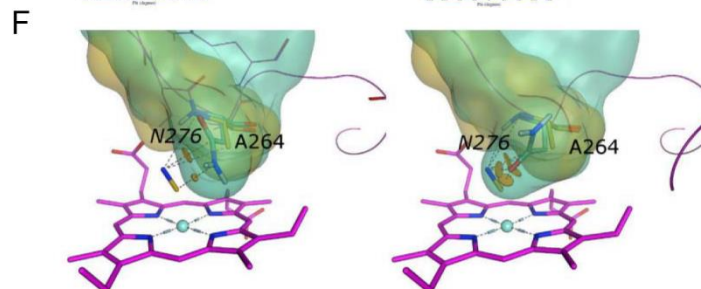

**Figure S2. (Homology and computational model), Related to Figure 1**

(A) Protein and pocket similarity matrices of human IDOs and *Aspergillus* Idos.

(B) Computational model showing binding sites shapes and properties for human IDO (2D0T), *A. fumigatus* IdoA and IdoB. In red are indicated the polar regions (left panel). On the right panel SiteMap analysis of the enzyme binding sites: metal binding areas (magenta), Hbond donor areas (blue), H bond acceptor areas (red) and lipophilic areas (yellow).

(C) Binding site residues of human IDO (2D0T, green) and *A. fumigatus* IdoA (cyan). Differences in residues are highlighted by labels (regular for human, in italics for *A. fumigatus*). The important differences on the top of the heme Fe atom are colored in magenta for both species. Hydrogen atoms are omitted for clarity.

(D) Binding site residues of human IDO (2D0T, green) and *A. fumigatus* IdoA (cyan) and *A. fumigatus* IdoB (yellow).

(E) Ramachandran plot of IdoA and IdoB and related statistics produced with PROCHECK.

(F) Comparison between Ala264 in human Ido (yellow crystal 2D0u) and Asn276 in *A. fumigatus* IdoA (cyan). The two figures represent two possible conformations of Asn: left) the conformation of Asn276 allowed the superoxide binding, represented by cyanide of 2D0U; right) possible scenario where the carbonyl oxygen of Asn276 is in the fine position to coordinate the Fe atom, making it unnecessary (or more difficult) for the superoxide to bind.

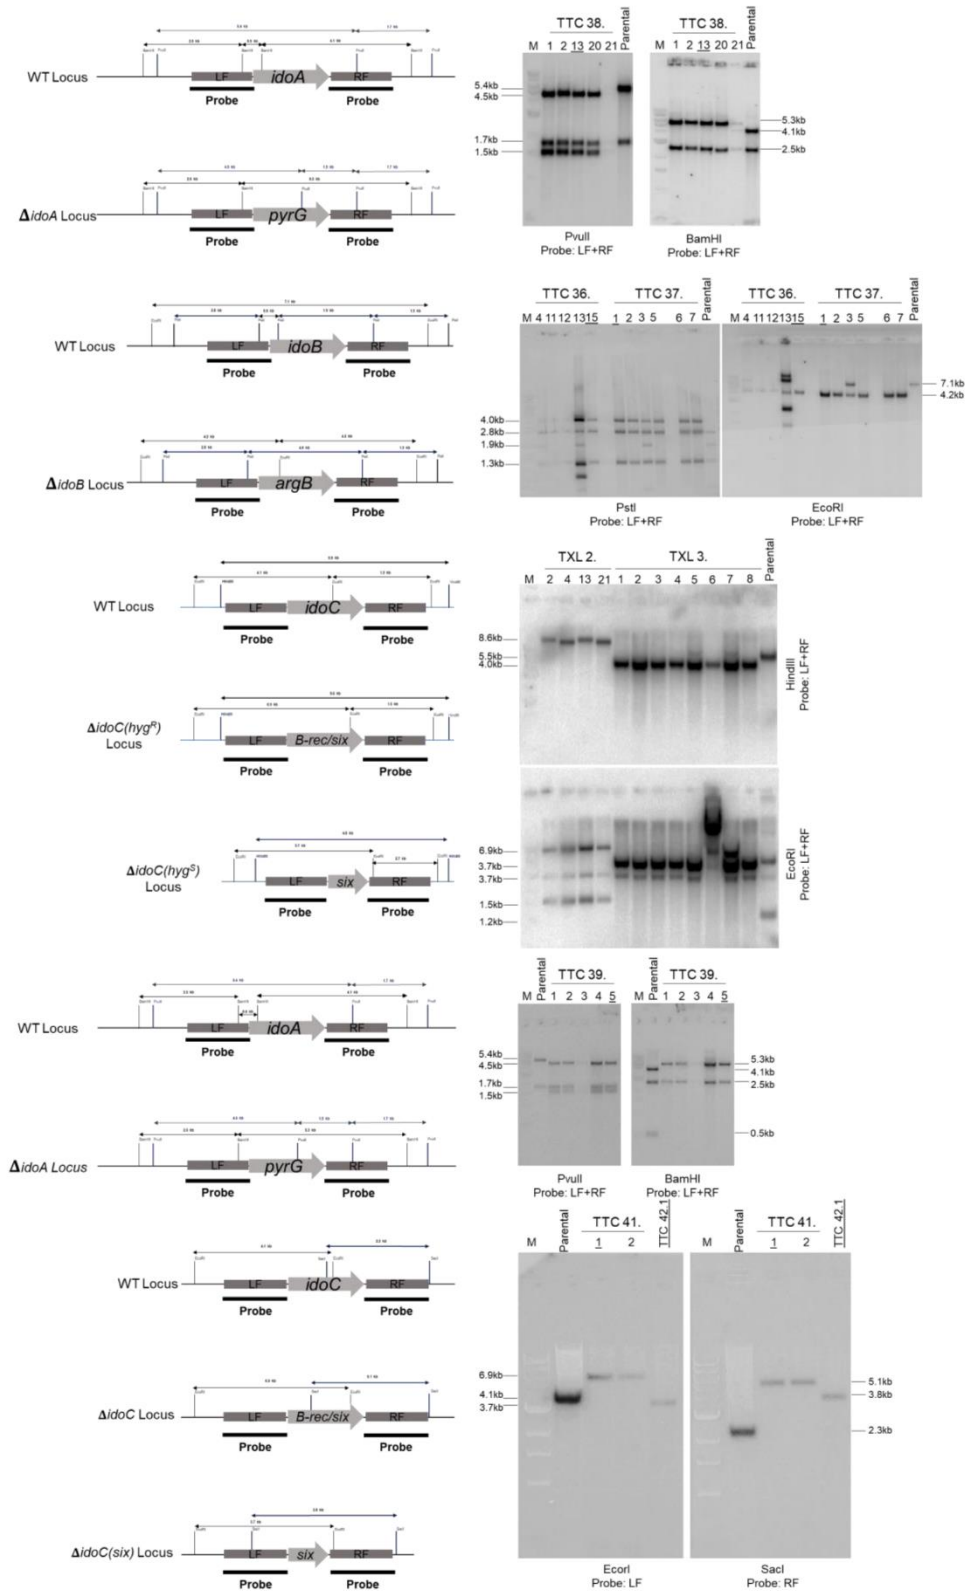

**Figure S3. (Southern confirmation of deletion of *A. fumigatus ido* mutants), Related to Figure 1.** Presented is the schematic representation of the *ido* genes, the markers used to delete the gene and the predicted sizes of DNA fragments of a correct gene deletion, also shown by radiolabeling on the right.

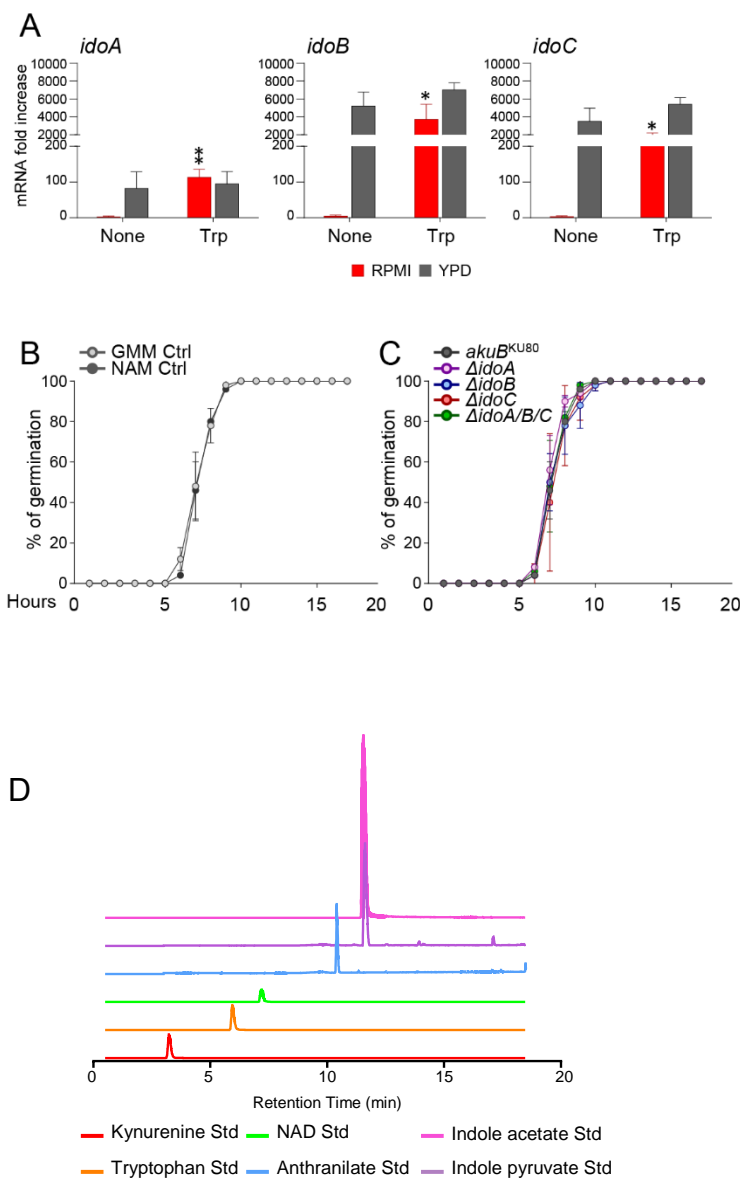

**Figure S4. (*Aspergillus* mutants exposure to different media), Related to Figure 1 and Figure 2.**

(A) mRNA expression (fold increase) of *idoA*, *idoB* and *idoC* in fungi grown in RPMI and YPD for 24 h with (60  $\mu$ M) or without (none) L-tryptophan (Trp). Statistical significance ( $*P < 0.01$ ,  $**P < 0.001$ ) was determined against untreated (None) sample (Two-way ANOVA - Bonferroni post-hoc test).

(B) Germination assessment of *A. fumigatus* wild type in unsupplemented (GMM) medium or supplemented with nicotinamide medium (NAM).

(C) Germination assessment of *A. fumigatus* mutant strains in NAM medium.

(D) Traces of standards measured on LCMS.

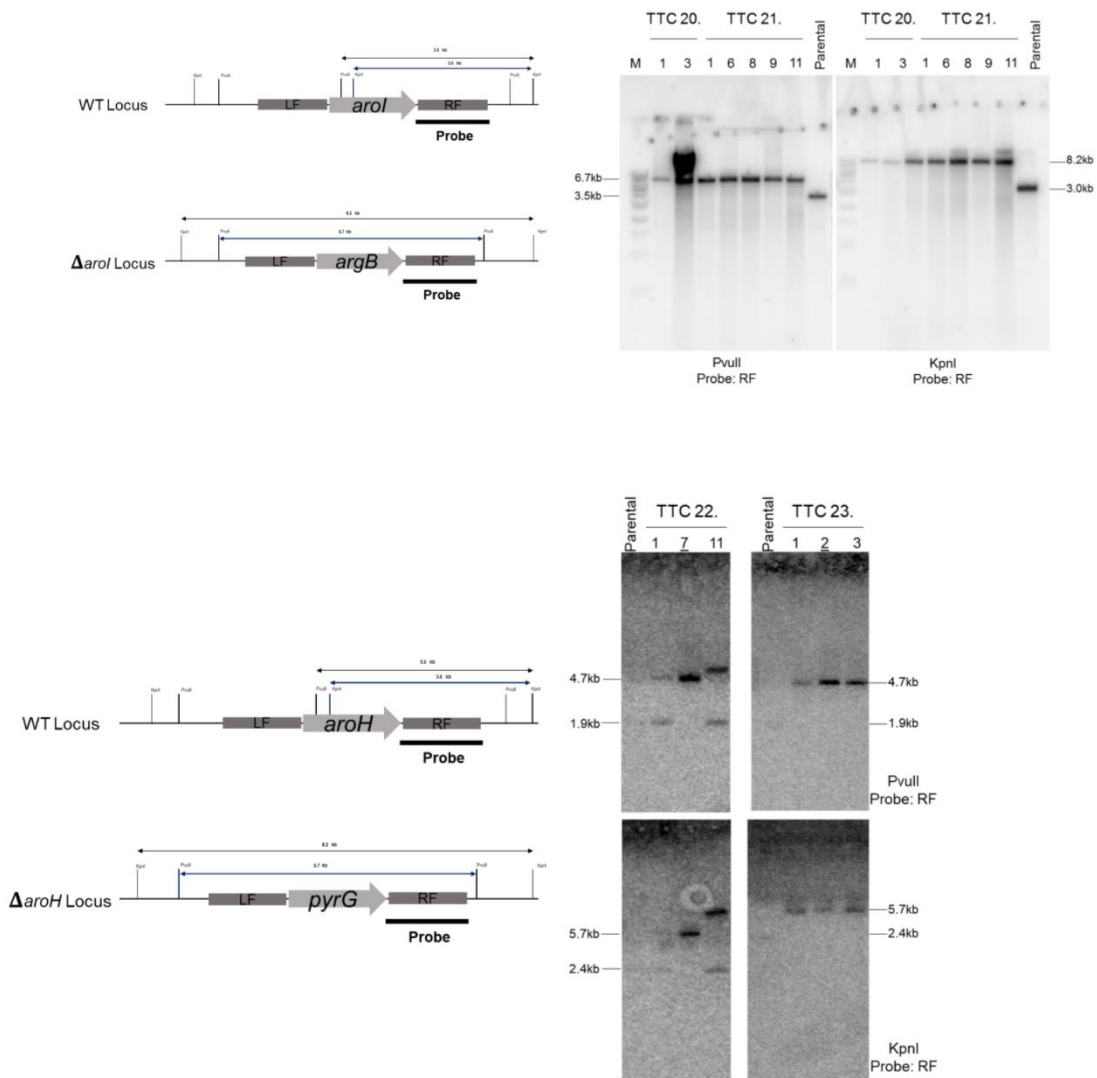

**Figure S5. *A. fumigatus* aro mutants, Related to Figure 2.**

(A) Southern confirmation of deletion of *A. fumigatus* aro mutants. Presented is schematic representation of the *aro* genes, the markers used to delete the gene and the predicted sizes of DNA fragments of a correct gene deletion, also shown by radiolabeling on the right.



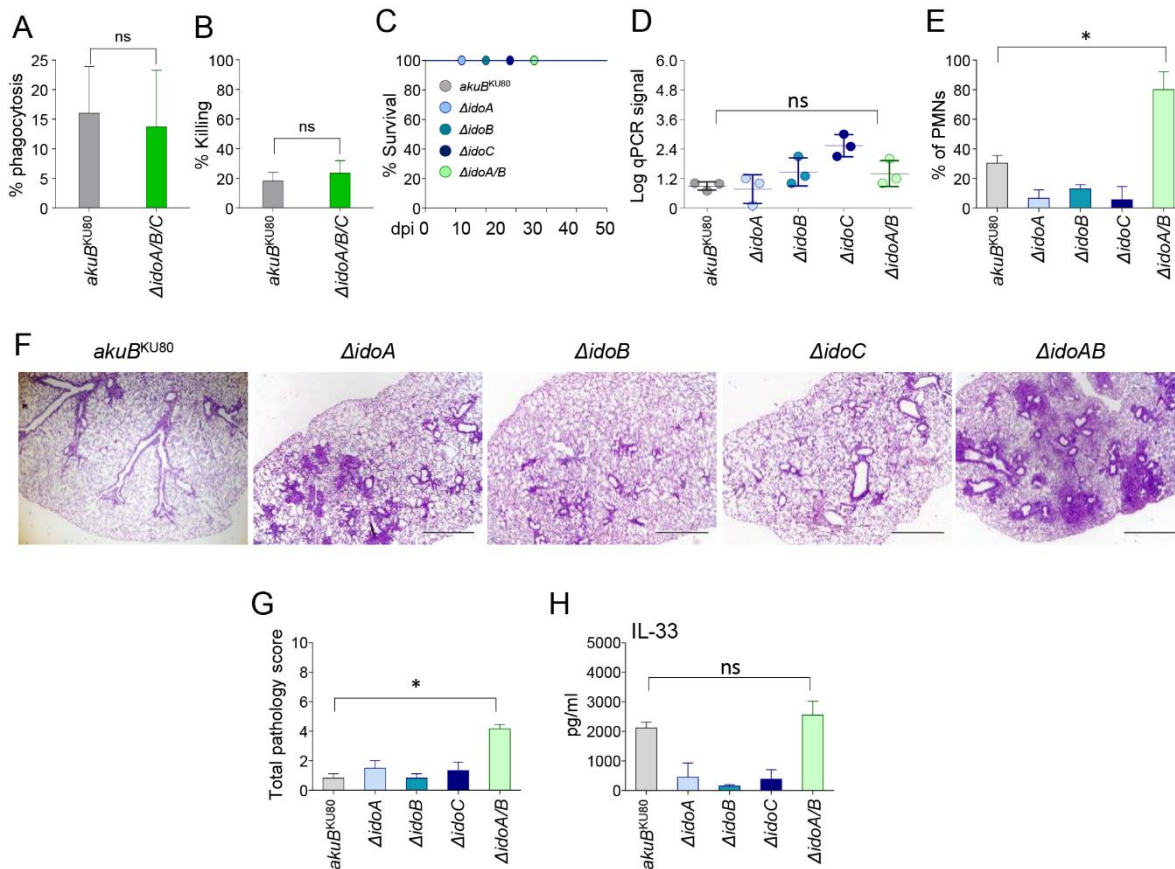

**Figure S6. (Pathogenicity of *Aspergillus* mutants *in vivo*), Related to Figure 3.**

(A) Percentage of phagocytosis (mean  $\pm$  sd), determined as the percentage of neutrophils containing at least 1 conidium. The experiments were repeated twice for each fungal species with two different primary cultures.

(B) Percentage of killing (mean  $\pm$  sd), determined as: percentage of colony formation inhibition =  $100 - (\text{CFU experimental group} / \text{CFU control cultures}) \times 100$ . For B, killing assay was done with five wells per condition in more than three independent experiments.

(C) Survival rates of infected mice. For C-H, C57BL/6 mice ( $n = 12$ ) were infected intranasally with  $2 \times 10^7$  *A. fumigatus* strains and sacrificed at 7 days post infections (dpi).

(D) 18S rRNA expression measured by qPCR from C57BL/6 lungs.

(E) Flow cytometry analysis of lung cells showing the percentage of pulmonary PMNs (CD11b<sup>+</sup> (FITC) and GR1<sup>+</sup> cells (V450)).

(F) Histopathological analyses (PAS staining) on lungs at 7 dpi, scale bars, 10  $\mu$ m.

(G) Total pathology score on lung histology at 7 dpi.

(H) Cytokine levels by ELISA. Data are represented as mean  $\pm$  s.d. of triplicate measurements. (G, H) Statistical significance (\* $P < 0.01$ .) was determined against mice infected with the *Aspergillus akuB<sup>KU80</sup>* strain (One-way ANOVA - Bonferroni post-hoc test).

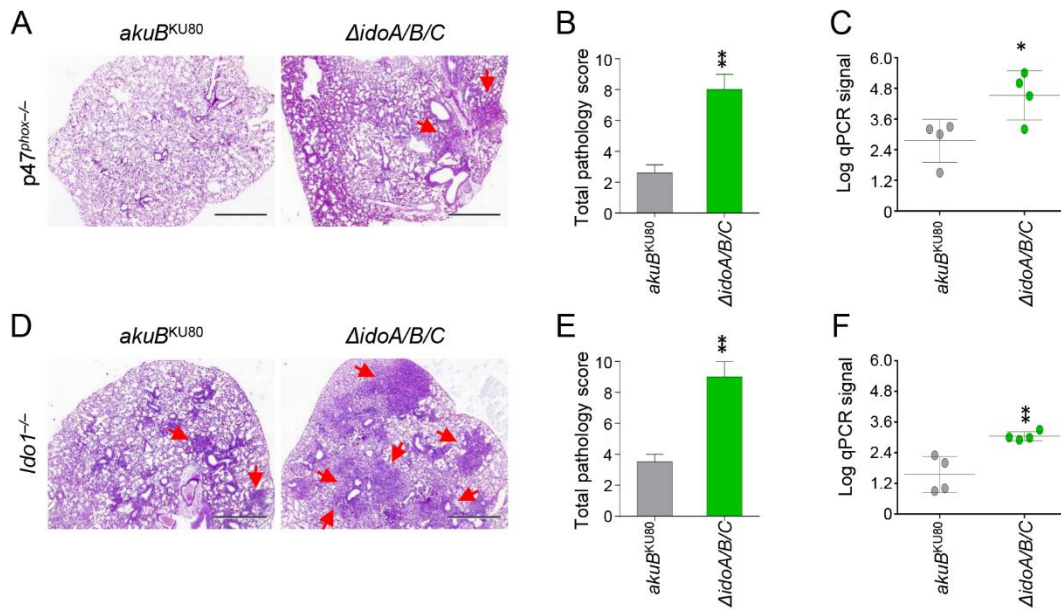

**Figure S7. (Mice susceptibility of *Aspergillus* mutants for *idos*), Related to Figure 3.** The indicated strain of mice ( $n = 12$ ) were infected intranasally with  $2 \times 10^7 A. fumigatus$  strains and sacrificed at 7 days post infections (dpi).

(**A** and **D**) Representative histopathological analyses (PAS staining) on lungs, scale bars, 10  $\mu\text{m}$ .

(**B** and **E**) Total pathology score on lung histology.

(**C** and **F**) 18S rRNA expression measured by qPCR from C57BL/6 lungs. Data are represented as mean  $\pm$  s.d. of triplicate measurements. Statistical significance ( $*P < 0.01$ ,  $**P < 0.001$ ) was determined against mice infected with the *Aspergillus* *akuB<sup>KU80</sup>* strain (Two tailed Student's t Test unpaired parametric).

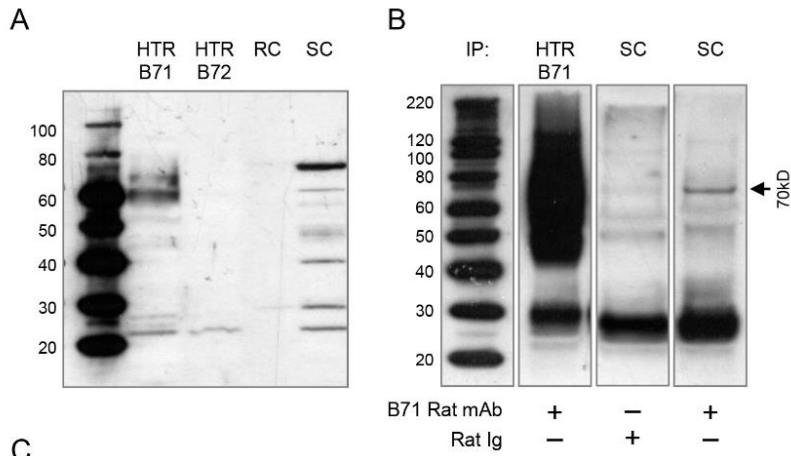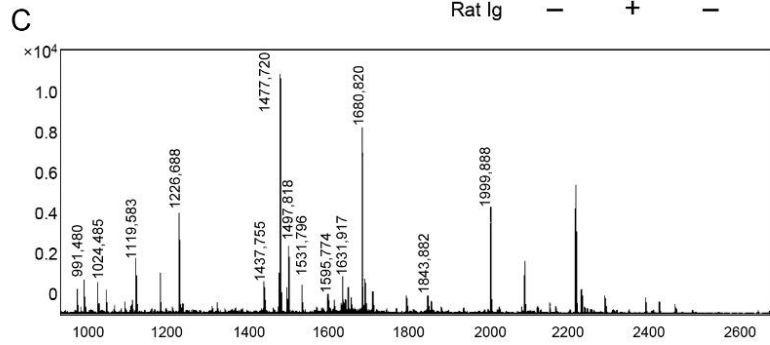

**D** CLUSTAL 2.1 multiple sequence alignment

```

XP_750490.1   MAPAVGIDLGTTYSVGVFRDDRIEIANDQGNRTTSPFVAFDTOTERLIGDAAKINQVAMN
AAI45844.1   -----MACNCQLMQD
                                     *.:*.:
XP_750490.1   PHNTVFDKRLIGRRFQDAEVQSDMKHWPFKWEKGGKPIIEVEFKGETKQFTPEEISSM
AAI45844.1   TPLLKFPCLRILLFVLLIRLS-----QVSSDVDEQLSKVKDKVLLPCRYNSPHEDESE
.  * . *** . .: . . . * : . : . : . : * : *
XP_750490.1   VLTMRETAAYLGGTVNNAVITVPAYFNDSQRQATKDAGLIAGLNVLRIINEPTAAAI
AAI45844.1   DRIYWQKHDKVVLVLS-VIAGKLVWPEYKNTLYDNNTYS-----LII
. : . * . : . : . * * * : . : *
XP_750490.1   YGLDKKAEGERNVLIFDLGGGTFDVSLLTIEEG-IFEVKATAGDTHLGGEDFDNRLVNHF
AAI45844.1   LGLVLSDRGTYSVQKKEKRGTYEVKHLALVKLSIKADFSTPNITESGNPSADTKRITCF
** . . * . : . : * : * . * : : * : * . * . * : : *
XP_750490.1   VNEFKRKHKKDLTTNARALRLRTACERAKRTLSSAAQTSIEIDSLFEGIDFYTSITRAR
AAI45844.1   ASGGFPKPRFSLNENRELPGINTTISQDP-----ESELYTSSQLDFNTRN---
. . * : . * * * : * : . : . * : : . : * * * :
XP_750490.1   FEELCQDLFRSTMEPVERVLDAKLDKSSVHEIVLVGGSTRIPKIQRLVADFFNKEANKS
AAI45844.1   -----HTIKCLIKYG-----
. : : : *
XP_750490.1   INPDEAVAYGAAVQAAILSGDTSSKSTNEILLDVAPLSLGIETAGGVMTPLIKRNTTIP
AAI45844.1   -----
XP_750490.1   TKKSETFSTYSDNQPGVLIQVVEGERARTKDNLLGKFFELTGIPAPRGVPIEVTFDVD
AAI45844.1   -----DAHVSEDFTWKPPEDPPDSKNTLVLFAG
. : : * . * . : : * * . .
XP_750490.1   ANGINVSAVEKGTGKTNKTIITNDKGRLSKEEIERMLDAEKYKEEDEAEAAARIQAKNG
AAI45844.1   FGAVITVVVIVVIIKFCCKHRSCFRR----RNEASRETNNSLTFGPEEALAEQTVFL---
. . : . * : . : * : * : : * : * :
XP_750490.1   LESYAYSLKNTISEGKLNISDADKEKVSKEVEIISWLDNNTQATKDEYESQQKELESVA
AAI45844.1   -----
XP_750490.1   NPIISAAYGGAAGAAPGGAAPGGATRDAVEVEERPEELD
AAI45844.1   -----

```

**Figure S8. (Identification of CTLA-4 binding molecule by mass spectrometry), Related to Figure 4.**

(A) Levels of B71-like protein molecule detected by western blot analysis.

(B) Silver-stained SDS-PAGE gel of anti-B71 immunoprecipitate. Bands were excised from the gel, trypsin-digested, and analyzed by MALDI-TOF. Identified protein is indicated by arrow at 70kD.

(C) MALDI-TOF spectrum of peptides corresponding to HSP70 (ID: XP\_750490.1) protein.

(D) Multiple sequence alignment of the *A. fumigatus* HSP70 (ID: XP\_750490.1) and mouse protein sequence of B71 (ID: AAI45844.1) using Clustal 2.1. (\*)= identical aa; (:)= highly conserved aa substitution; (.)= conserved substitution. Alignment identified a similar region of identity between the two molecules at G115 of B71 protein, which is a peculiar binding region for B71 binding to CTLA-4 in mammals in the IgV-like domain (red box).

| <b>ID</b> | <b>Strain</b>                          | <b>Genotype</b>                                                                                                                                                                                                                                                      | <b>Reference</b>                   |
|-----------|----------------------------------------|----------------------------------------------------------------------------------------------------------------------------------------------------------------------------------------------------------------------------------------------------------------------|------------------------------------|
| Control   | CEA17 <i>pyrG</i> <sup>+</sup><br>KU80 | <i>pyrG1</i> , $\Delta$ <i>akuB</i> :: <i>pyrG</i>                                                                                                                                                                                                                   | <i>Silva Ferreira et al., 2006</i> |
| CEA17     | CEA17 <i>pyrG</i> <sup>-</sup><br>KU80 | <i>pyrG1</i> , $\Delta$ <i>akuB</i> :: <i>pyrG</i> , <i>pyrG1</i>                                                                                                                                                                                                    | <i>Silva Ferreira et al., 2006</i> |
| TJG1.6    | $\Delta$ <i>argB</i>                   | <i>pyrG1</i> , $\Delta$ <i>akuB</i> :: <i>pyrG</i> , <i>pyrG1</i> , $\Delta$ <i>argB</i> :: <i>pyrG</i>                                                                                                                                                              | <i>Wiemann et al., 2017</i>        |
| TMN2.1    | $\Delta\Delta$ <i>argB/pyrG</i>        | <i>pyrG1</i> , $\Delta$ <i>akuB</i> :: <i>pyrG</i> , <i>pyrG1</i> , $\Delta$ <i>argB</i> :: <i>pyrG</i> , $\Delta$ <i>pyrG</i>                                                                                                                                       | <i>Wiemann et al., 2017</i>        |
| TTC38.13  | $\Delta$ <i>idoA</i>                   | <i>pyrG1</i> , $\Delta$ <i>akuB</i> :: <i>pyrG</i> , <i>pyrG1</i> , <i>argB</i> :: <i>pyrG</i> , $\Delta$ <i>AFUB_066940</i> :: <i>argB</i>                                                                                                                          | This study                         |
| TTC37.1   | $\Delta$ <i>idoB</i>                   | <i>pyrG1</i> , $\Delta$ <i>akuB</i> :: <i>pyrG</i> , <i>pyrG1</i> , $\Delta$ <i>AFUB_034980</i> :: <i>pyrG</i>                                                                                                                                                       | This study                         |
| TXL3.2    | $\Delta$ <i>idoC</i>                   | <i>pyrG1</i> , $\Delta$ <i>akuB</i> :: <i>pyrG</i> , <i>pyrG1</i> , $\Delta$ <i>argB</i> :: <i>pyrG</i> , $\Delta$ <i>pyrG</i> , $\Delta$ <i>AFUB_088580</i> :: <i>six</i> , <i>pyrG</i> , <i>argB</i>                                                               | This study                         |
| TTC39.5   | $\Delta\Delta$ <i>idoA/B</i>           | <i>pyrG1</i> , $\Delta$ <i>akuB</i> :: <i>pyrG</i> , <i>pyrG1</i> , $\Delta$ <i>argB</i> :: <i>pyrG</i> , $\Delta$ <i>pyrG</i> , $\Delta$ <i>AFUB_034980</i> :: <i>pyrG</i> , $\Delta$ <i>AFUB_066940</i> :: <i>argB</i>                                             | This study                         |
| TTC42.1   | $\Delta\Delta\Delta$ <i>idoA/B/C</i>   | <i>pyrG1</i> , $\Delta$ <i>akuB</i> :: <i>pyrG</i> , <i>pyrG1</i> , $\Delta$ <i>argB</i> :: <i>pyrG</i> , $\Delta$ <i>pyrG</i> , $\Delta$ <i>AFUB_034980</i> :: <i>pyrG</i> , $\Delta$ <i>AFUB_066940</i> :: <i>argB</i> , $\Delta$ <i>AFUB_088580</i> :: <i>six</i> | This study                         |
| TTC 21.6  | $\Delta$ <i>aroI</i>                   | <i>pyrG1</i> , $\Delta$ <i>akuB</i> :: <i>pyrG</i> , <i>pyrG1</i> , $\Delta$ <i>argB</i> :: <i>pyrG</i> , $\Delta$ <i>akuB</i> :: <i>pyrG</i> , $\Delta$ <i>AFUB_051500</i> :: <i>argB</i>                                                                           | This study                         |
| TTC 22.7  | $\Delta$ <i>aroH</i>                   | <i>pyrG1</i> , $\Delta$ <i>akuB</i> :: <i>pyrG</i> , <i>pyrG1</i> , $\Delta$ <i>AFUB_029280</i> :: <i>pyrG</i>                                                                                                                                                       | This study                         |
| TTC 23.1  | $\Delta\Delta$ <i>aroH/I</i>           | <i>pyrG1</i> , $\Delta$ <i>akuB</i> :: <i>pyrG</i> , <i>pyrG1</i> , $\Delta$ <i>argB</i> :: <i>pyrG</i> , $\Delta$ <i>pyrG</i> , $\Delta$ <i>AFUB_051500</i> :: <i>argB</i> , $\Delta$ <i>AFUB_029280</i> :: <i>pyrG</i>                                             | This study                         |

**Table S1. Fungal Strains used in this study, Related to STAR Methods**

| Number  | Name               | Sequence 5' - 3'                                               | Associated Gene |
|---------|--------------------|----------------------------------------------------------------|-----------------|
| TC-1131 | TC-DAfu3g14250 F1  | ATTACCCTGGATGCGTCAACG                                          | <i>idoA</i>     |
| TC-1134 | TC-DAfu3g14250 R1  | TTCGATATCAAGCTATCGATACCTCGACTCTGTAGG<br>CAGGATTCAATGCAC        | <i>idoA</i>     |
| TC-1132 | TC-DAfu3g14250 F2  | CTGTGCTGCAGCCTCTCCGATTGTCGAATCCCGAT<br>CAGGGTATTGAGAGT         | <i>idoA</i>     |
| TC-1135 | TC-DAfu3g14250 R2  | TCGTGAAGAAGACTTCGGAGC                                          | <i>idoA</i>     |
| TC-1133 | TC-DAfu3g14250 F3  | ATTGACTACGTCCTCAAGGCTG                                         | <i>idoA</i>     |
| TC-1136 | TC-DAfu3g14250 R3  | TGTTTGAGATGCAGGACTGC                                           | <i>idoA</i>     |
| TC-1137 | TC-diAfu3g14250 F  | ATTGGCCAGGATATATTGTCTCC                                        | <i>idoA</i>     |
| TC-1138 | TC-diAfu3g14250 R  | GATCCGAGAGCCCCCTTAG                                            | <i>idoA</i>     |
| TC-20   | Arg F              | GAACGCGGTCTGCATCCAAG                                           | <i>argB</i>     |
| TC-21   | ArgR               | GAAGGAGAGACCCATACATCC                                          | <i>argB</i>     |
| TC-1113 | TC-DAfu4g09830 F1  | ACCAAGCTGCAAAATCGACG                                           | <i>idoB</i>     |
| TC-1114 | TC-DAfu4g09830 R1  | TGTCTTGGATGCAGACCGGTTCTGTCGAAGCCAGA<br>ATATAAGGGGACG           | <i>idoB</i>     |
| TC-1115 | TC-DAfu4g09830 F2  | ATCAAATGGATGTATGGGTCTCTCCTTCACTCATTT<br>GAGTGGAAACTCAGC        | <i>idoB</i>     |
| TC-1116 | TC-DAfu4g09830 R2  | TTCGAAATCCAAATCAAGC                                            | <i>idoB</i>     |
| TC-1117 | TC-DAfu4g09830 F3  | ACTGGATTCCCGGAAGCAGG                                           | <i>idoB</i>     |
| TC-1118 | TC-DAfu4g09830 R3  | AGCCCATGGAACCGTTCTACG                                          | <i>idoB</i>     |
| TC-1119 | TC-diAfu4g09830 F1 | TCGCTGATTTACCAGCTCTGC                                          | <i>idoB</i>     |
| TC-1120 | TC-diAfu4g09830 R1 | TGCTGGAGTGTCTTTCGAACG                                          | <i>idoB</i>     |
| TC-4    | pyrG_prom_F        | CGTAATACGACTCACTATAGGG                                         | <i>pyrG</i>     |
| TC-5    | pyrG_term_R        | ATTCGACAATCGGAGAGGCTGC                                         | <i>pyrG</i>     |
| XL-1    | DAfu7g02010 F1     | TCGAGTTCGTTGCTTGGATGC                                          | <i>idoC</i>     |
| XL-2    | DAfu7g02010 R1     | CTATTGACCTATAGGACCTGAGTGATGCGGTAGAA<br>GTTGACAAGAAGAGAG        | <i>idoC</i>     |
| XL-3    | DAfu7g02010 F2     | TAAGTTGAGCATAAATATGGTCCATCTAGTGCTTGTC<br>CGTAGATTGTGTAGGTAG    | <i>idoC</i>     |
| XL-4    | DAfu7g02010 R2     | GCAGGCTCCTGCTCTTCATCTT                                         | <i>idoC</i>     |
| XL-5    | diAfu7g02010R      | TGGTGTCAACATCAAGACCCA                                          | <i>idoC</i>     |
| XL-6    | DAfu7g02010F3      | TAGTTGGTGAGCTGTACGGTG                                          | <i>idoC</i>     |
| XL-7    | DAfu7g02010R3      | GCGTCTTTCGACATGTCTTCC                                          | <i>idoC</i>     |
| TC-1104 | TC- DAfu2g13630F1  | CGATTGTGCTAAACAACAGGGGC                                        | <i>aroH</i>     |
| TC-1105 | TC- DAfu2g13630R1  | GTCGCTGCAGCCTCTCCGATTGTCGAATTCAGAATA<br>CGATGCTCTCAAGTTCAGCCGG | <i>aroH</i>     |
| TC-1106 | TC-DAfu2g13630 F2  | CGATATCAAGCTATCGATACCTCGACTCACAATACC<br>AACGCCATTTTTGTCTCCGCCG | <i>aroH</i>     |
| TC-1107 | TC-DAfu2g13630 R2  | ATTGGCTATGGATCGAGATGGCC                                        | <i>aroH</i>     |
| TC-1108 | TC-diAfu2g13630 F1 | ACGGCATTC AAGCAGATCAACG                                        | <i>aroH</i>     |
| TC-1109 | TC-diAfu2g13630 R1 | AGTCATGCACTAGCCACACG                                           | <i>aroH</i>     |

|         |                   |                                                             |             |
|---------|-------------------|-------------------------------------------------------------|-------------|
| TC-1110 | TC-diAfu2g13630F1 | GCAGTGATATGTTCAAGAGCCC                                      | <i>aroH</i> |
| TC-1111 | TC-diAfu2g13630R1 | CACGCTAATCTCTTCGAAAGGG                                      | <i>aroH</i> |
| TC-1141 | TC-DAfu5g02990 F1 | TGAGGATGCAGGTTTACTGACAC                                     | <i>aroI</i> |
| TC-1142 | TC-DAfu5g02990 R1 | GAAAATTTGTCTTGGATGCAGACCGCGTTCCTTGAG<br>CAATCAAGTCCTTTACAGC | <i>aroI</i> |
| TC-1143 | TC-DAfu5g02990 R3 | TACTGATTTGGCTGGCAAGG                                        | <i>aroI</i> |
| TC-1144 | TC-DAfu5g02990F2  | ATCAAATGGATGTATGGGTCTCTCCTTCTTGTTTAT<br>AATAGCATCGAGACG     | <i>aroI</i> |
| TC-1145 | TC-DAfu5g02990F3  | AGGTTCAAAAGTGCCTGATCTTG                                     | <i>aroI</i> |
| TC-1146 | TC-DAfu5g02990R2  | AGGTGGTCCCATAATCAAACG                                       | <i>aroI</i> |
| TC-1147 | TC-diAfu5g02990F  | TGATTTCTATCGAAAAATGGTGG                                     | <i>aroI</i> |
| TC-112  | TC-Act 1 F2       | CTTCCAGCCTAGCGTTCTG                                         | <i>actA</i> |
| TC-113  | TC-Act 1 R2       | ATCCACATCTGCTGGAAGG                                         | <i>actA</i> |
| TC-1206 | IdoA F            | ATGCTTCCTCTATCCCCGCTC                                       | <i>idoA</i> |
| TC-1207 | IdoA R            | GAGGGAGCTCTAGATGGTTCGC                                      | <i>idoA</i> |
| TC-1119 | IdoB F            | TCGCTGATTTACCAGCTCTGC                                       | <i>idoB</i> |
| TC-1208 | IdoB R            | TGAAGAACCATTCTTCGTCCTTGG                                    | <i>idoB</i> |
| TC-1210 | IdoC F            | AAAGTGGTCGATAACCCTTGAGC                                     | <i>idoC</i> |
| TC-1211 | IdoC R            | AACTCGTGTAGGATCTTGGTGAG                                     | <i>idoC</i> |
| TC-1139 | AroH F            | TTCGTACCTGAGCCTAGATGTCG                                     | <i>aroH</i> |
| TC-1140 | AroH R            | GATGCTTCTGCCAATCGATCTC                                      | <i>aroH</i> |
| TC-1234 | AroI F1           | AACTGGGATTGCACCAAAGGACG                                     | <i>aroI</i> |
| TC-1235 | AroI R1           | AGTCTCAGTAAGGCGGGTGATCC                                     | <i>aroI</i> |

**Table S2: *Aspergillus* primers used in this study, Related to STAR Methods**

| Gene           | Primers Sequence (5'-3')        | Annealing Temperature (°C) |
|----------------|---------------------------------|----------------------------|
| <i>18S</i>     | Sense → ATGCCC GTTCTTAGTTGGTG   | 58                         |
|                | αSense → GAGCCGATAGTCCCCCTAAG   |                            |
| <i>aroH</i>    | Sense → AAAGTCCCGACAGCAATCTACA  | 60                         |
|                | αSense → TGGGACTTTCACGCTAATCTCT |                            |
| <i>idoA</i>    | Sense → ATGCCTGTCTCGCTATGC      | 55                         |
|                | αSense → CTCGGGTGTACGGTTTCG     |                            |
| <i>idoB</i>    | Sense → AGGAAGTTGTCGCTGATTTACC  | 54                         |
|                | αSense → ATGCTCGCCGCCATTCTG     |                            |
| <i>idoC</i>    | Sense → TCAGCCAGGATGGCAGTC      | 55                         |
|                | αSense → TCGTCAGTCAGGTCAGGAAG   |                            |
| <i>β-actin</i> | Sense → AGCCATGTACGTAGCCATCC    | 59                         |
|                | αSense → CTCTCAGCTGTGGTGGTGAA   |                            |
| <i>Il33</i>    | Sense → TCCTGCCTCCCTGAGTACAT    | 58                         |
|                | αSense → CACCTGGTCTTGCTCTTGGT   |                            |
| <i>Cyp11a1</i> | Sense → ACAGTGATTGGCAGAGATCG    | 60                         |
|                | αSense → GAAGGGGACGAAGGATGAAT   |                            |
| <i>pqsH</i>    | Sense → TGATGTCGATGCCTTCCAGT    | 55                         |
|                | αSense → CTCATCCAGCCCCTCCAGTA   |                            |
| <i>Il10</i>    | Sense → CCCTTTGCTATGGTGTCTT     | 56                         |
|                | αSense → TGGTTTCTCTTCCCAAGACC   |                            |
| <i>Foxp3</i>   | Sense → CCCAGGAAAGACAGCAACCTTTT | 59                         |
|                | αSense → TTCTCACAACCAGGCCACTTG  |                            |

**Table S3: qPCR primers used in this study, Related to STAR Methods**



| NAME                          | SEQUENCE 5' → 3'                           | USE                                                |
|-------------------------------|--------------------------------------------|----------------------------------------------------|
| AB For LB <i>IDO</i> A        | GCCAAGCTTGCATGCCCCGGGAAACTTTTGGGTCCCTGCTT  | Construction of the deletion cassette <i>IDO</i> A |
| AB Rev LB <i>IDO</i> A        | GGACCTGAGTGATGCTAGGCAGGATTCAATGCACA        |                                                    |
| AB For RB <i>IDO</i> A        | TGGTCCATCTAGTGCATTTGCATTAGCGGTGCTTC        |                                                    |
| AB RevRB <i>IDO</i> A         | AATTCGAGCTCGGTACCCCGGGTGTACAAGCTCAAGCGGCTA |                                                    |
| AB For LB <i>IDO</i> B        | GCCAAGCTTGCATGCCCCGGGCACATGATCACTGGGAAACG  | Construction of the deletion cassette <i>IDO</i> B |
| AB Rev LB <i>IDO</i> B        | GGACCTGAGTGATGCGTCCATGTCGAAGCCAGAAT        |                                                    |
| AB For RB <i>IDO</i> B        | TGGTCCATCTAGTGCGTGGGAGCTTTCACCAGATG        |                                                    |
| AB RevRB <i>IDO</i> B         | AATTCGAGCTCGGTACCCCGGGAAACAATGCTCGCTTCGACT |                                                    |
| AB For LB <i>IDO</i> C        | GCCAAGCTTGCATGCCCCGGGCTTTGCTTCGTCGACACTGA  | Construction of the deletion cassette <i>IDO</i> C |
| AB Rev LB <i>IDO</i> C        | GGACCTGAGTGATGCAGAGAAACAGACGGGGGATT        |                                                    |
| AB For RB <i>IDO</i> C        | TGGTCCATCTAGTGCCGCTGTCCACTGCTACGAT         |                                                    |
| AB RevRB <i>IDO</i> C         | AATTCGAGCTCGGTACCCCGGGATTTGAGCCACCTTGTACGG |                                                    |
| AB Screen <i>IDO</i> A<br>For | GAGTCAGCATTAGAATCTCCCT                     | <i>IDO</i> A primers for PCR analysis              |
| AB Screen <i>IDO</i> A<br>Rev | CCATTCCACATCTACACCCC                       |                                                    |
| AB Screen <i>IDO</i> B<br>For | CAACACGCCTCCGTTATAGA                       | <i>IDO</i> B primers for PCR analysis              |
| AB Screen <i>IDO</i> B<br>Rev | CAGCTCAGCCAGCTTCTTTT                       |                                                    |
| AB Screen <i>IDO</i> C<br>For | ACATCGGTCAATCCTCCAAG                       | <i>IDO</i> C primers for PCR analysis              |
| AB Screen <i>IDO</i> C<br>Rev | TTTCCCCACTTAATCCATGC                       |                                                    |

**Table S4: Primer list used in this study to generate fungal *ido* mutant strains by electroporation, Related to STAR Methods**

| Q1<br>(m/z) | Q3<br>(m/z) | RT<br>(min) | ANALYTE                                                              | DP | FP  | EP | CE | CXP |
|-------------|-------------|-------------|----------------------------------------------------------------------|----|-----|----|----|-----|
| 225.0       | 110         | 2.6         | 3-hydroxy-kynurenine                                                 | 15 | 150 | 10 | 20 | 15  |
| 225.0       | 162         | 2.6         | 3-hydroxy-kynurenine                                                 | 15 | 150 | 10 | 20 | 15  |
| 228.2       | 210         | 2.6         | 3-hydroxy-kynurenine- <sup>13</sup> C <sub>2</sub> - <sup>15</sup> N | 15 | 125 | 10 | 20 | 15  |
| 228.2       | 110         | 2.6         | 3-hydroxy-kynurenine- <sup>13</sup> C <sub>2</sub> - <sup>15</sup> N | 15 | 125 | 10 | 20 | 15  |
| 177.0       | 160         | 5.7         | serotonine                                                           | 24 | 258 | 10 | 15 | 8   |
| 177.0       | 115         | 5.7         | serotonine                                                           | 24 | 258 | 10 | 28 | 8   |
| 209.0       | 192         | 5.5         | L -kynurenine                                                        | 23 | 203 | 10 | 17 | 11  |
| 209.0       | 94          | 5.5         | L -kynurenine                                                        | 23 | 203 | 10 | 17 | 11  |
| 215.2       | 169         | 5.3         | L -kynurenine D6                                                     | 23 | 203 | 10 | 17 | 11  |
| 215.2       | 98          | 5.3         | L -kynurenine D6                                                     | 23 | 203 | 10 | 17 | 11  |
| 154.0       | 136         | 6.5         | 3-hydroxy-anthranilic-acid                                           | 15 | 140 | 10 | 15 | 8   |
| 154.0       | 80          | 6.5         | 3-hydroxy-anthranilic-acid                                           | 15 | 140 | 10 | 35 | 4   |
| 157.1       | 139         | 6.4         | 3-hydroxy-anthranilic-acid-D3                                        | 15 | 140 | 10 | 15 | 8   |
| 157.1       | 83          | 6.4         | 3-hydroxy-anthranilic-acid-D3                                        | 15 | 140 | 10 | 35 | 4   |
| 205.1       | 146         | 7.5         | tryptophan                                                           | 30 | 200 | 10 | 30 | 15  |
| 205.1       | 188         | 7.5         | tryptophan                                                           | 30 | 200 | 10 | 30 | 15  |
| 161.0       | 144         | 8.1         | tryptamine                                                           | 36 | 250 | 10 | 29 | 7   |
| 161.0       | 117         | 8.1         | tryptamine                                                           | 36 | 250 | 10 | 31 | 7   |
| 138.1       | 120         | 9.4         | anthranilic-acid                                                     | 15 | 100 | 10 | 16 | 7   |
| 138.1       | 92          | 9.4         | anthranilic-acid                                                     | 15 | 100 | 10 | 30 | 9   |
| 142.2       | 124         | 9.3         | anthranilic-acid-D4                                                  | 15 | 100 | 10 | 16 | 7   |
| 142.2       | 96          | 9.3         | anthranilic-acid-D4                                                  | 15 | 100 | 10 | 30 | 9   |
| 175.1       | 130         | 9.8         | indol-3-acetamide                                                    | 19 | 143 | 10 | 16 | 9   |
| 175.1       | 158         | 9.8         | indol-3-acetamide                                                    | 19 | 143 | 10 | 25 | 9   |
| 206.1       | 160         | 10.5        | indol-3-lactic-acid                                                  | 19 | 210 | 10 | 27 | 10  |
| 206.1       | 132         | 10.5        | indol-3-lactic-acid                                                  | 19 | 210 | 10 | 30 | 10  |

|       |     |      |                           |    |     |    |    |    |
|-------|-----|------|---------------------------|----|-----|----|----|----|
| 183.1 | 136 | 10.8 | indol-3-acetic-acid D7    | 36 | 280 | 10 | 22 | 9  |
| 183.1 | 109 | 10.8 | indol-3-acetic-acid D7    | 36 | 280 | 10 | 43 | 6  |
| 176.1 | 130 | 10.9 | indol-3-acetic-acid       | 36 | 280 | 10 | 22 | 9  |
| 176.1 | 103 | 10.9 | indol-3-acetic-acid       | 36 | 280 | 10 | 43 | 6  |
| 146.1 | 118 | 10.8 | indole-3-carboxy-aldehyde | 25 | 250 | 10 | 25 | 7  |
| 146.1 | 91  | 10.8 | indole-3-carboxy-aldehyde | 25 | 250 | 10 | 28 | 7  |
| 190.1 | 130 | 11.2 | indol-3-propionic-acid    | 30 | 143 | 10 | 18 | 8  |
| 190.1 | 172 | 11.2 | indol-3-propionic-acid    | 30 | 143 | 10 | 14 | 12 |
| 157.0 | 130 | 11.9 | indol-3-acetonitrile      | 15 | 180 | 10 | 18 | 9  |
| 157.0 | 117 | 11.9 | indol-3-acetonitrile      | 15 | 180 | 10 | 23 | 9  |

**Table S5: List of chromatographic retention time (RT), selected MRM parameters, declustering potential (DP), focusing potential (FP), entrance potential (EP), collision energy (CE), cell exit potential (CXP) for each measured analyte, Related to STAR Methods**

| <b>TIME (min)</b> | <b>FLOW (mL/min)</b> | <b>B (%)</b> |
|-------------------|----------------------|--------------|
| 0                 | 0.300                | 0            |
| 11                | 0.300                | 40           |
| 13                | 0.300                | 95           |
| 21                | 0.300                | 95           |
| 22                | 0.300                | 0            |
| 33                | 0.300                | 0            |

**Table S6: Chromatographic conditions, Related to STAR Methods**
